# Supplementary material for: Physiological characterization of secondary metabolite producing Penicillium cell factories
Source: PubMed Central journal article supplement (PMC5644182; doi:10.1186/s40694-017-0036-z), 2017-10-17

**Pcoprophilum\_DM1**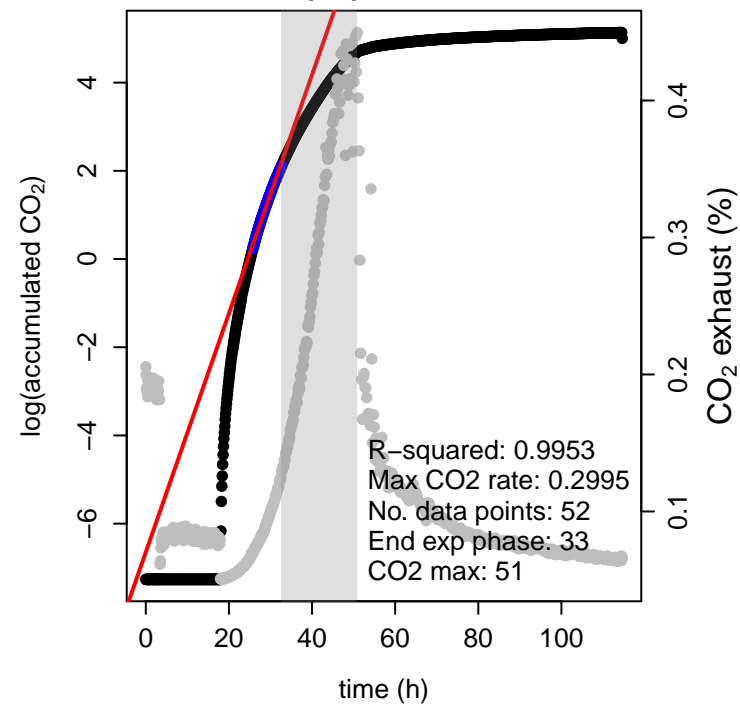**Pcoprophilum\_DM2**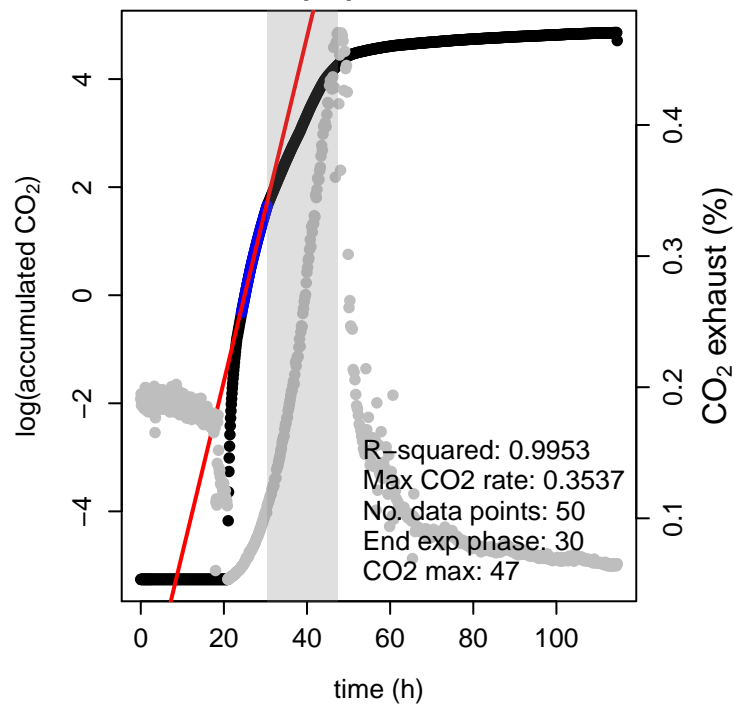**Pcoprophilum\_DM3**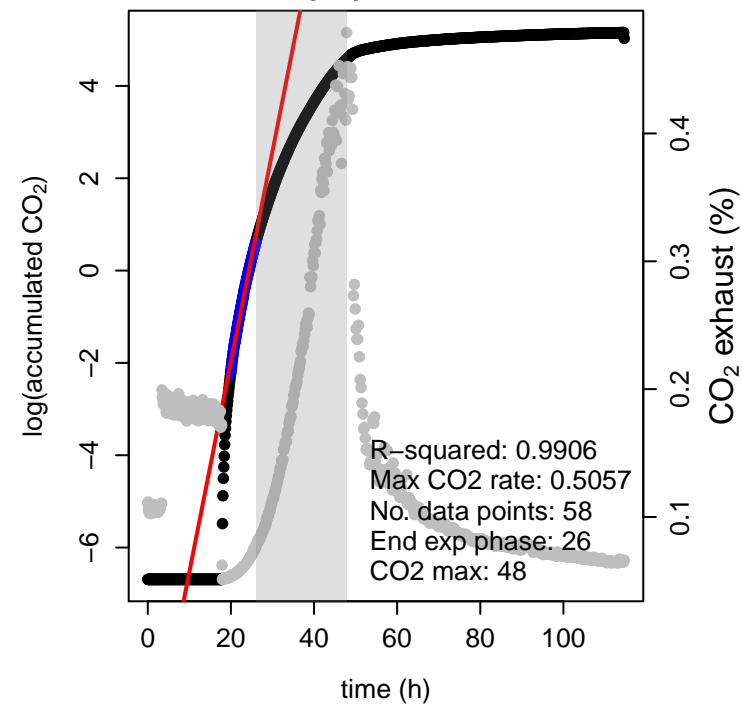**Pcoprophilum\_CM1**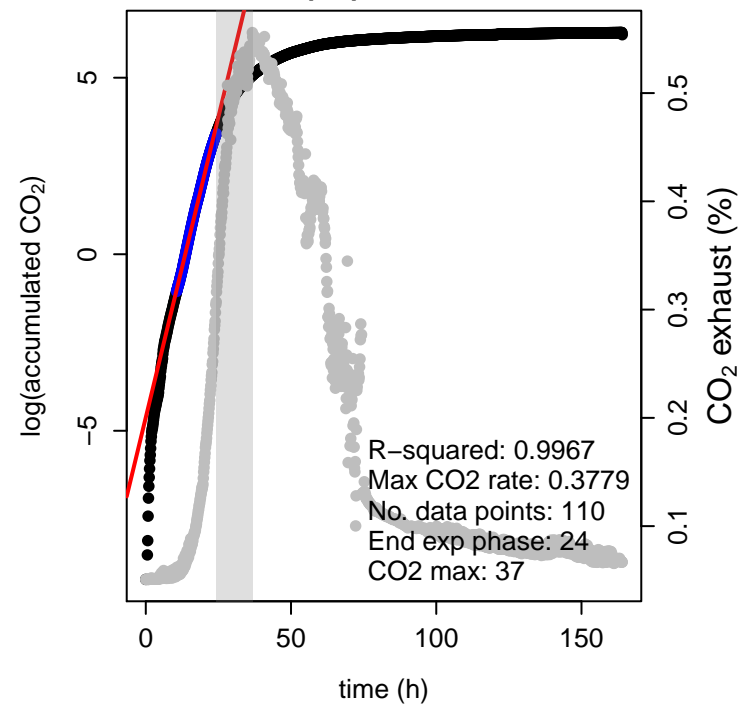**Pcoprophilum\_CM2**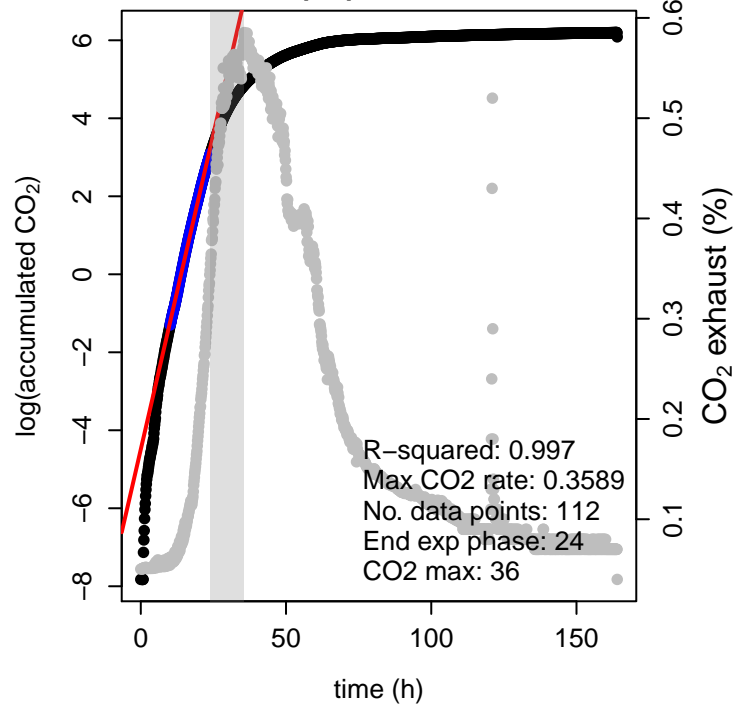**Pcoprophilum\_CM3**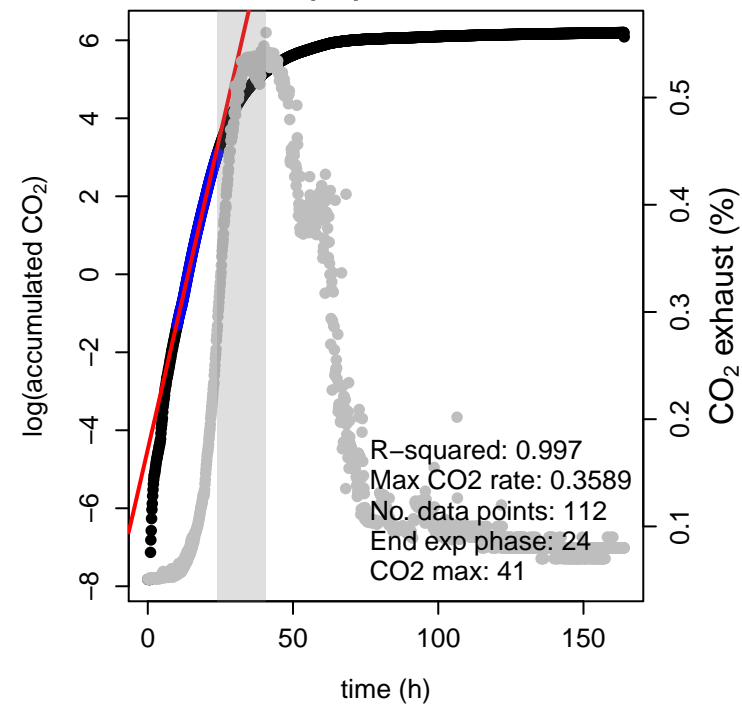

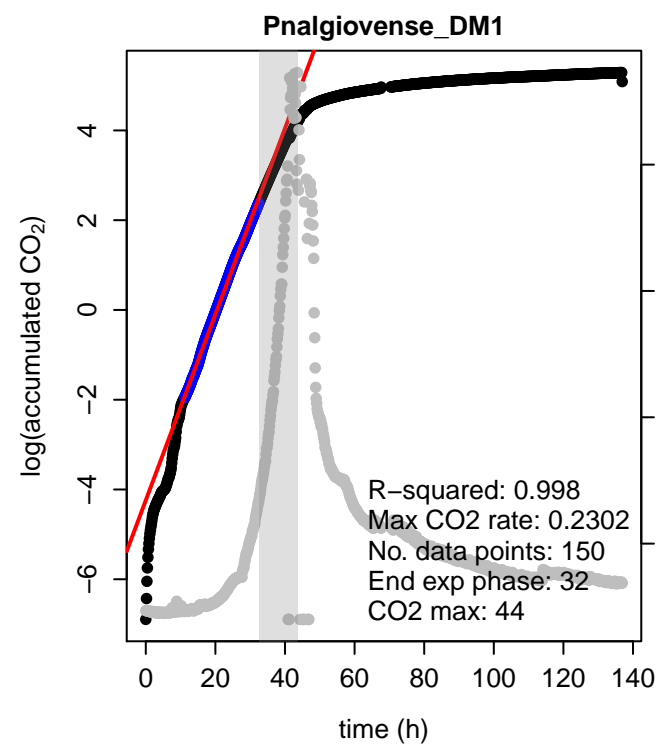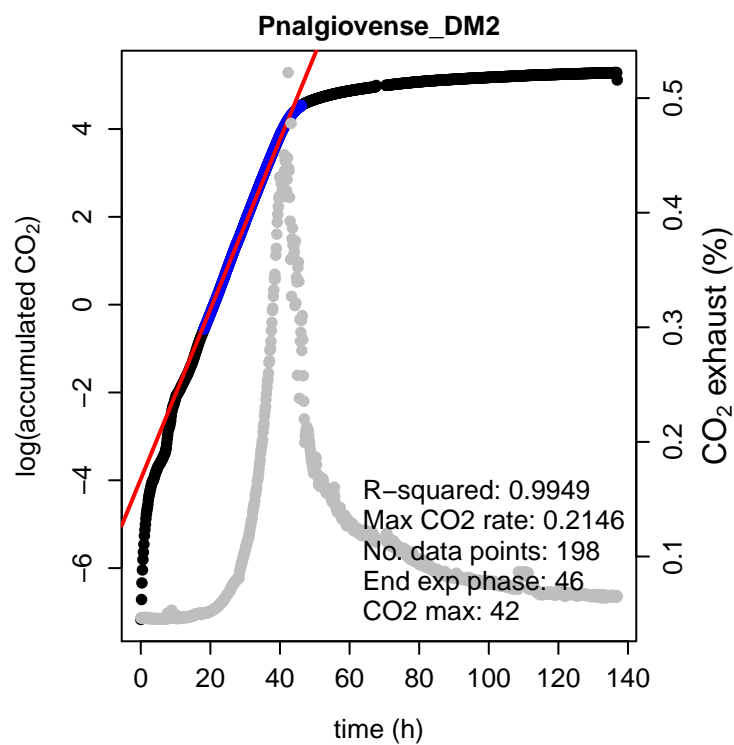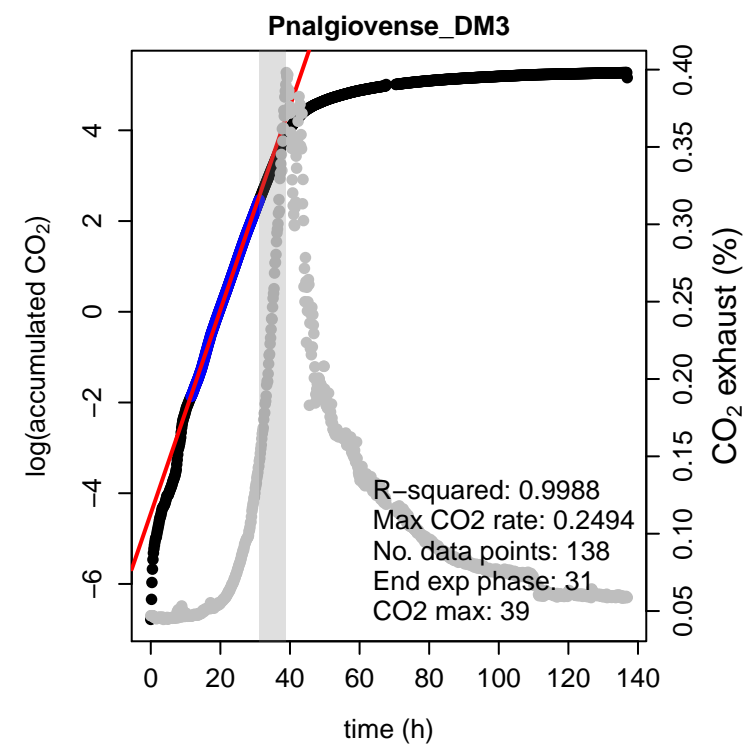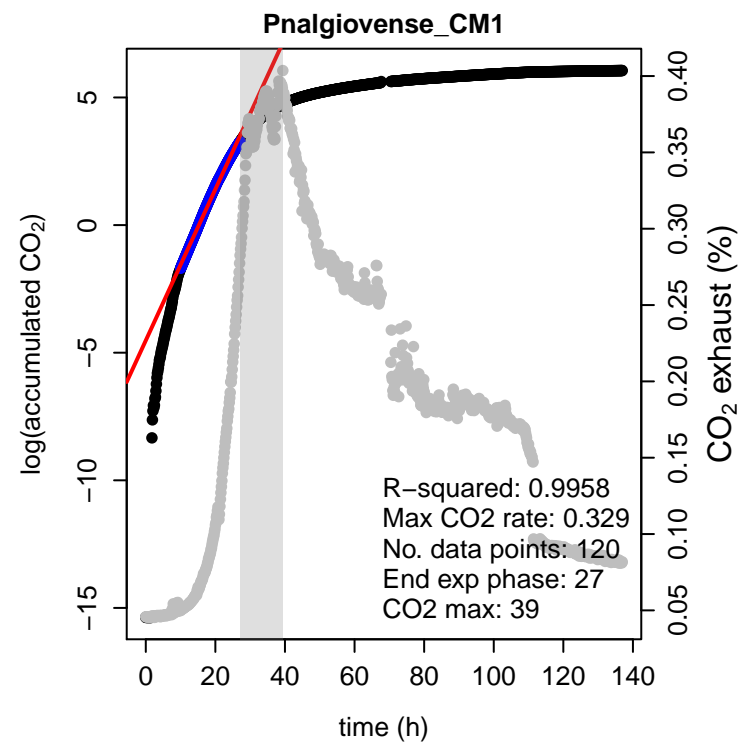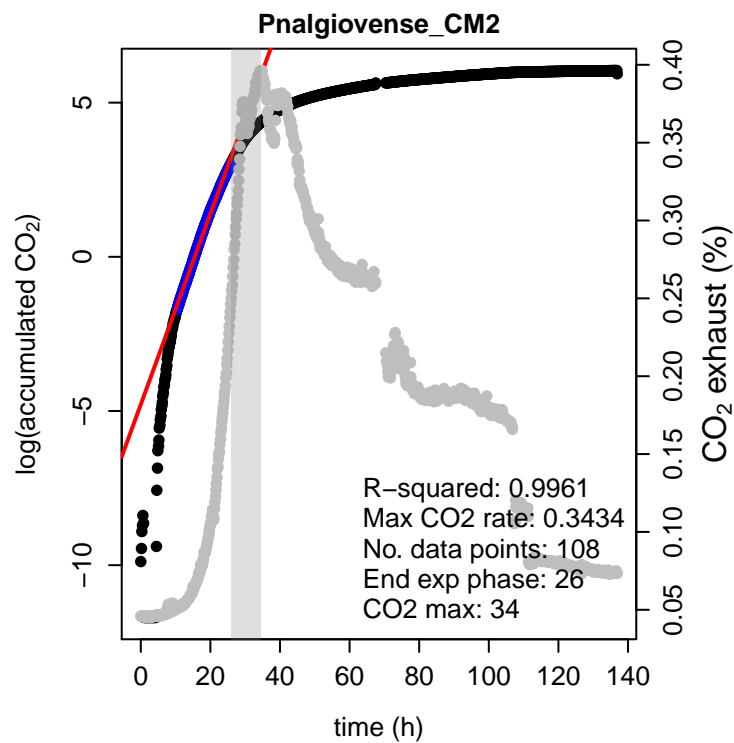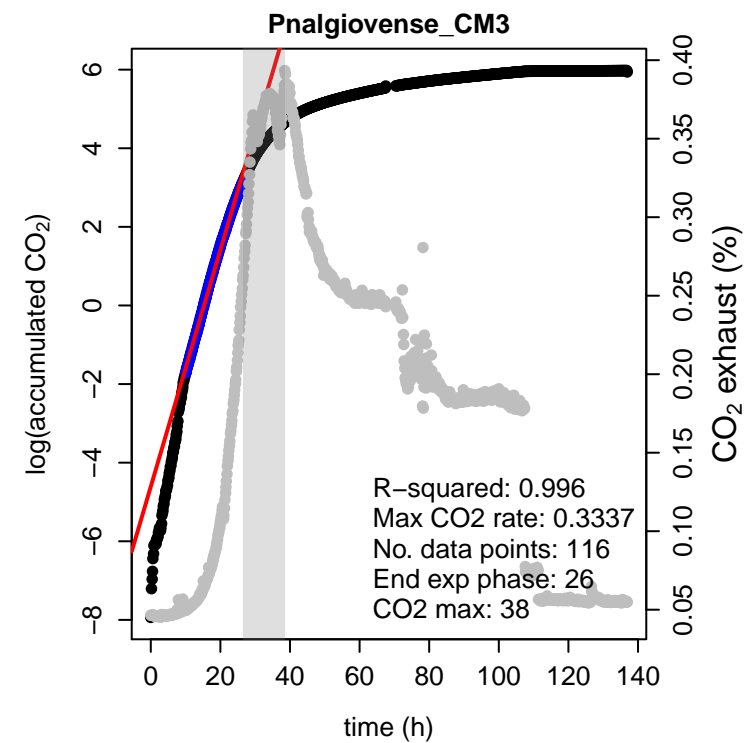

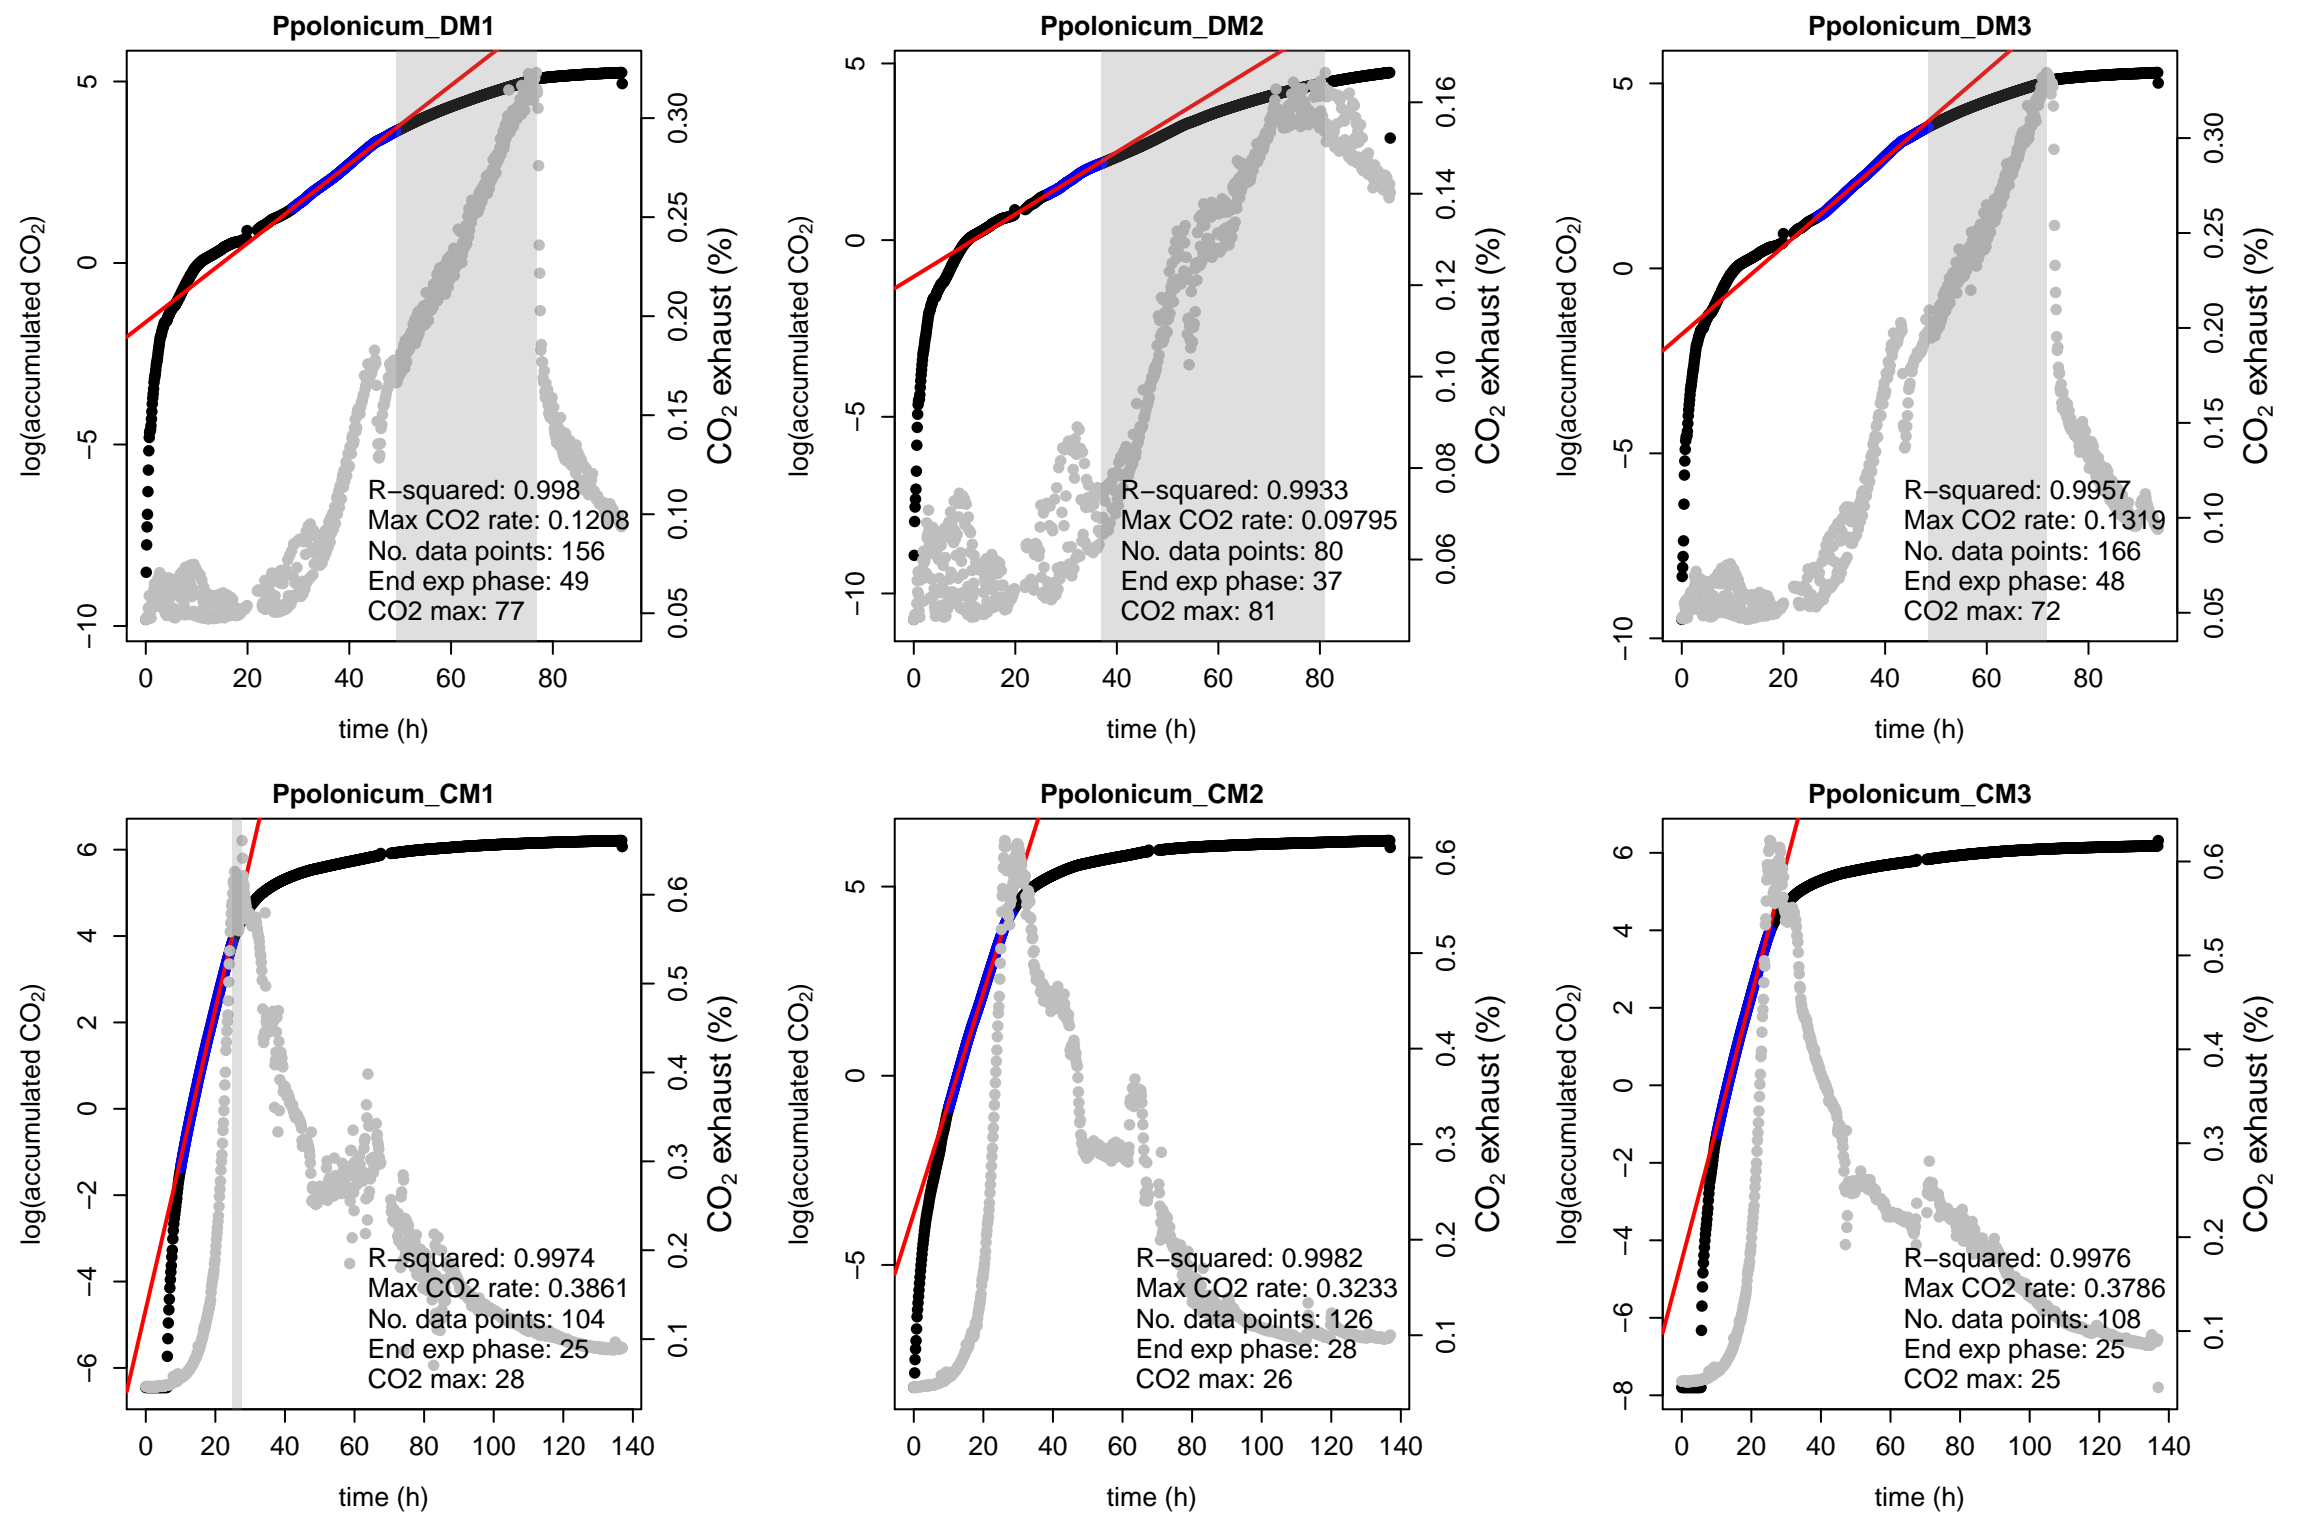

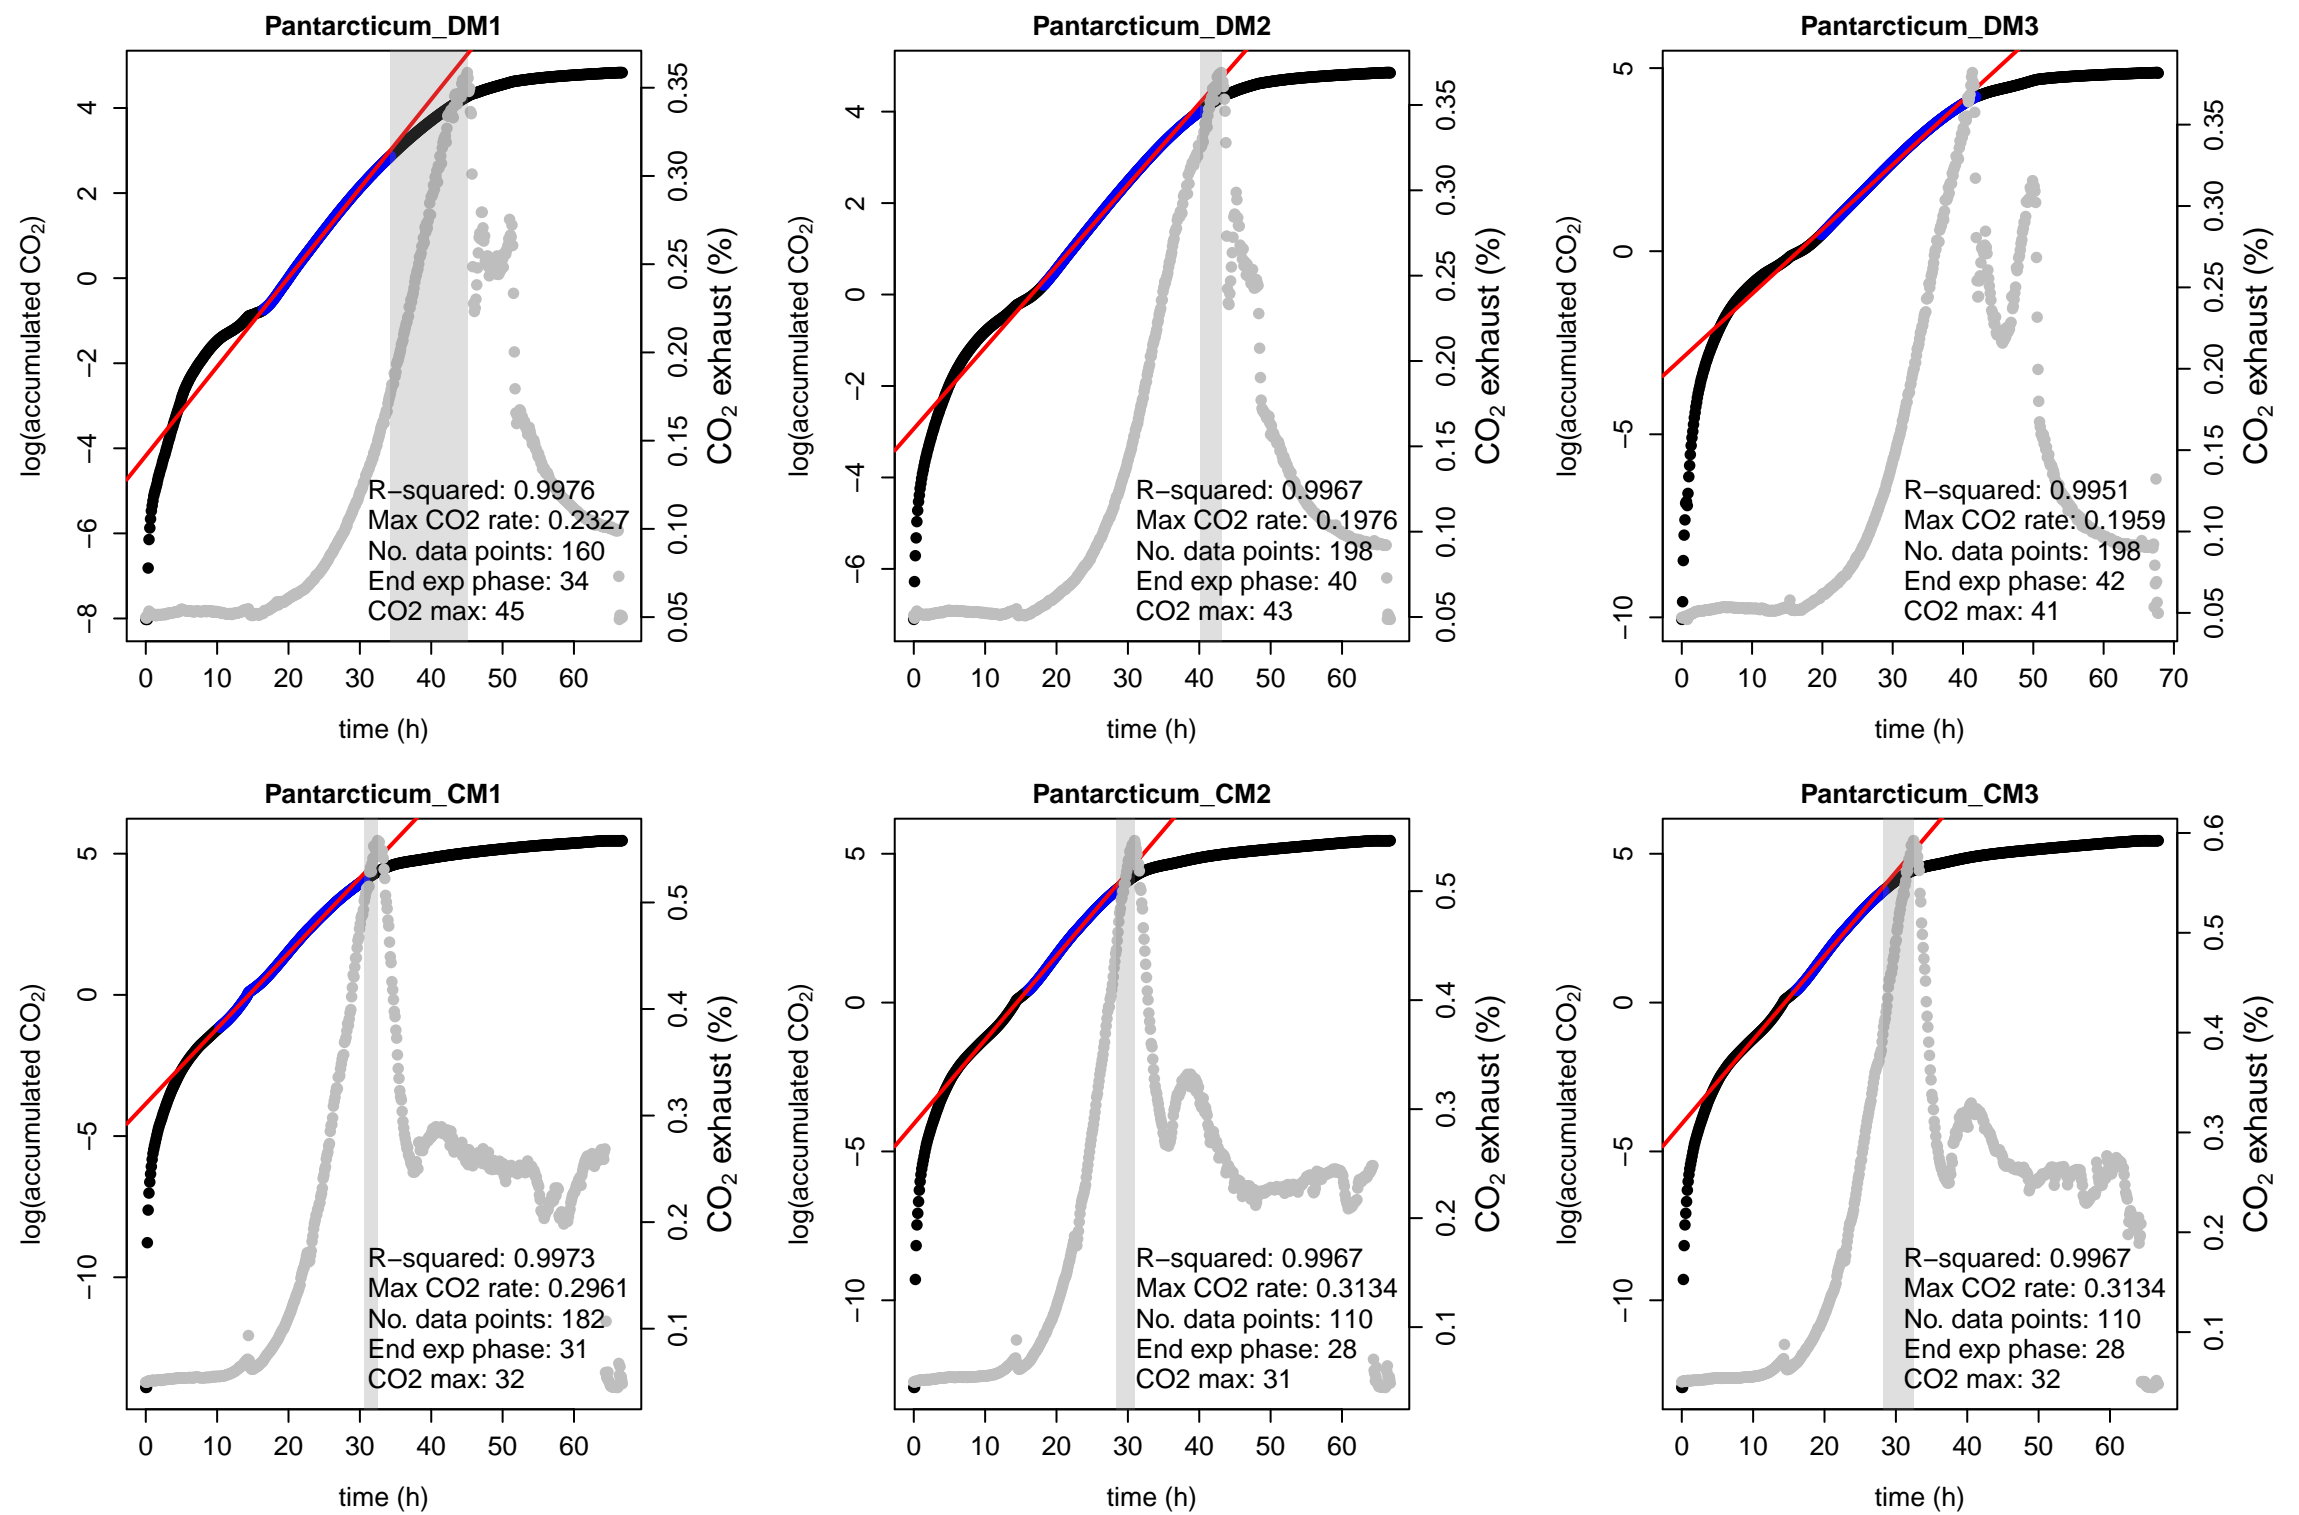

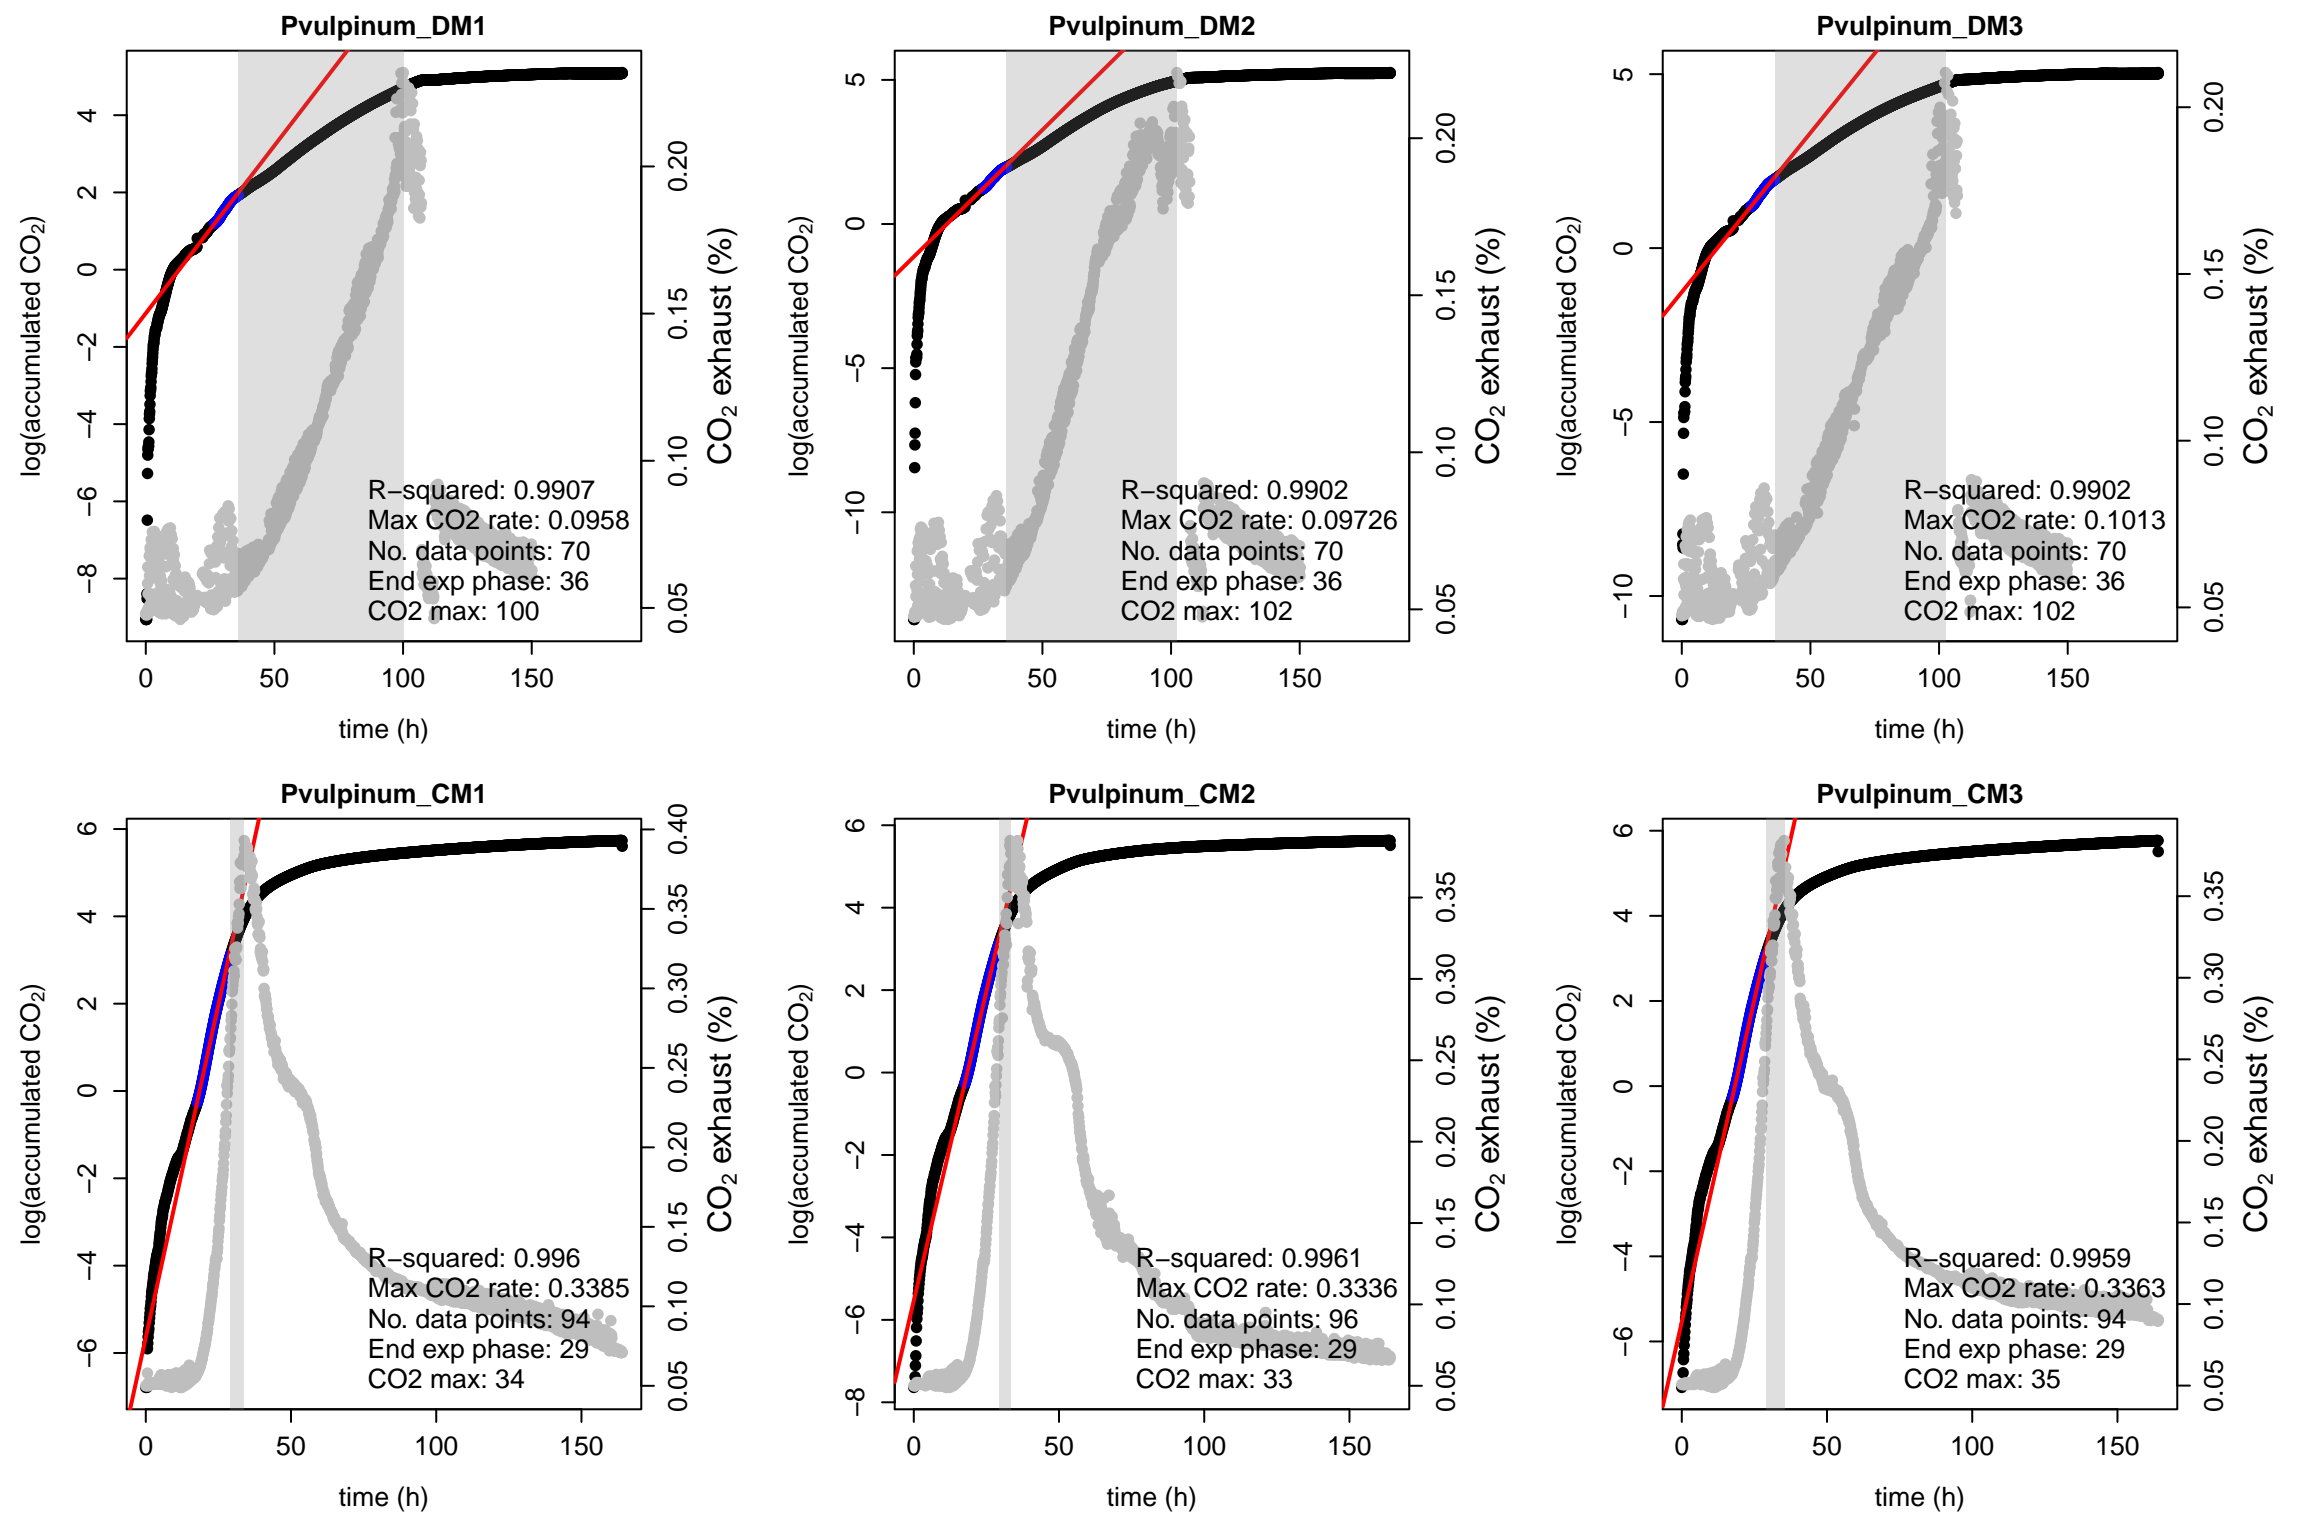

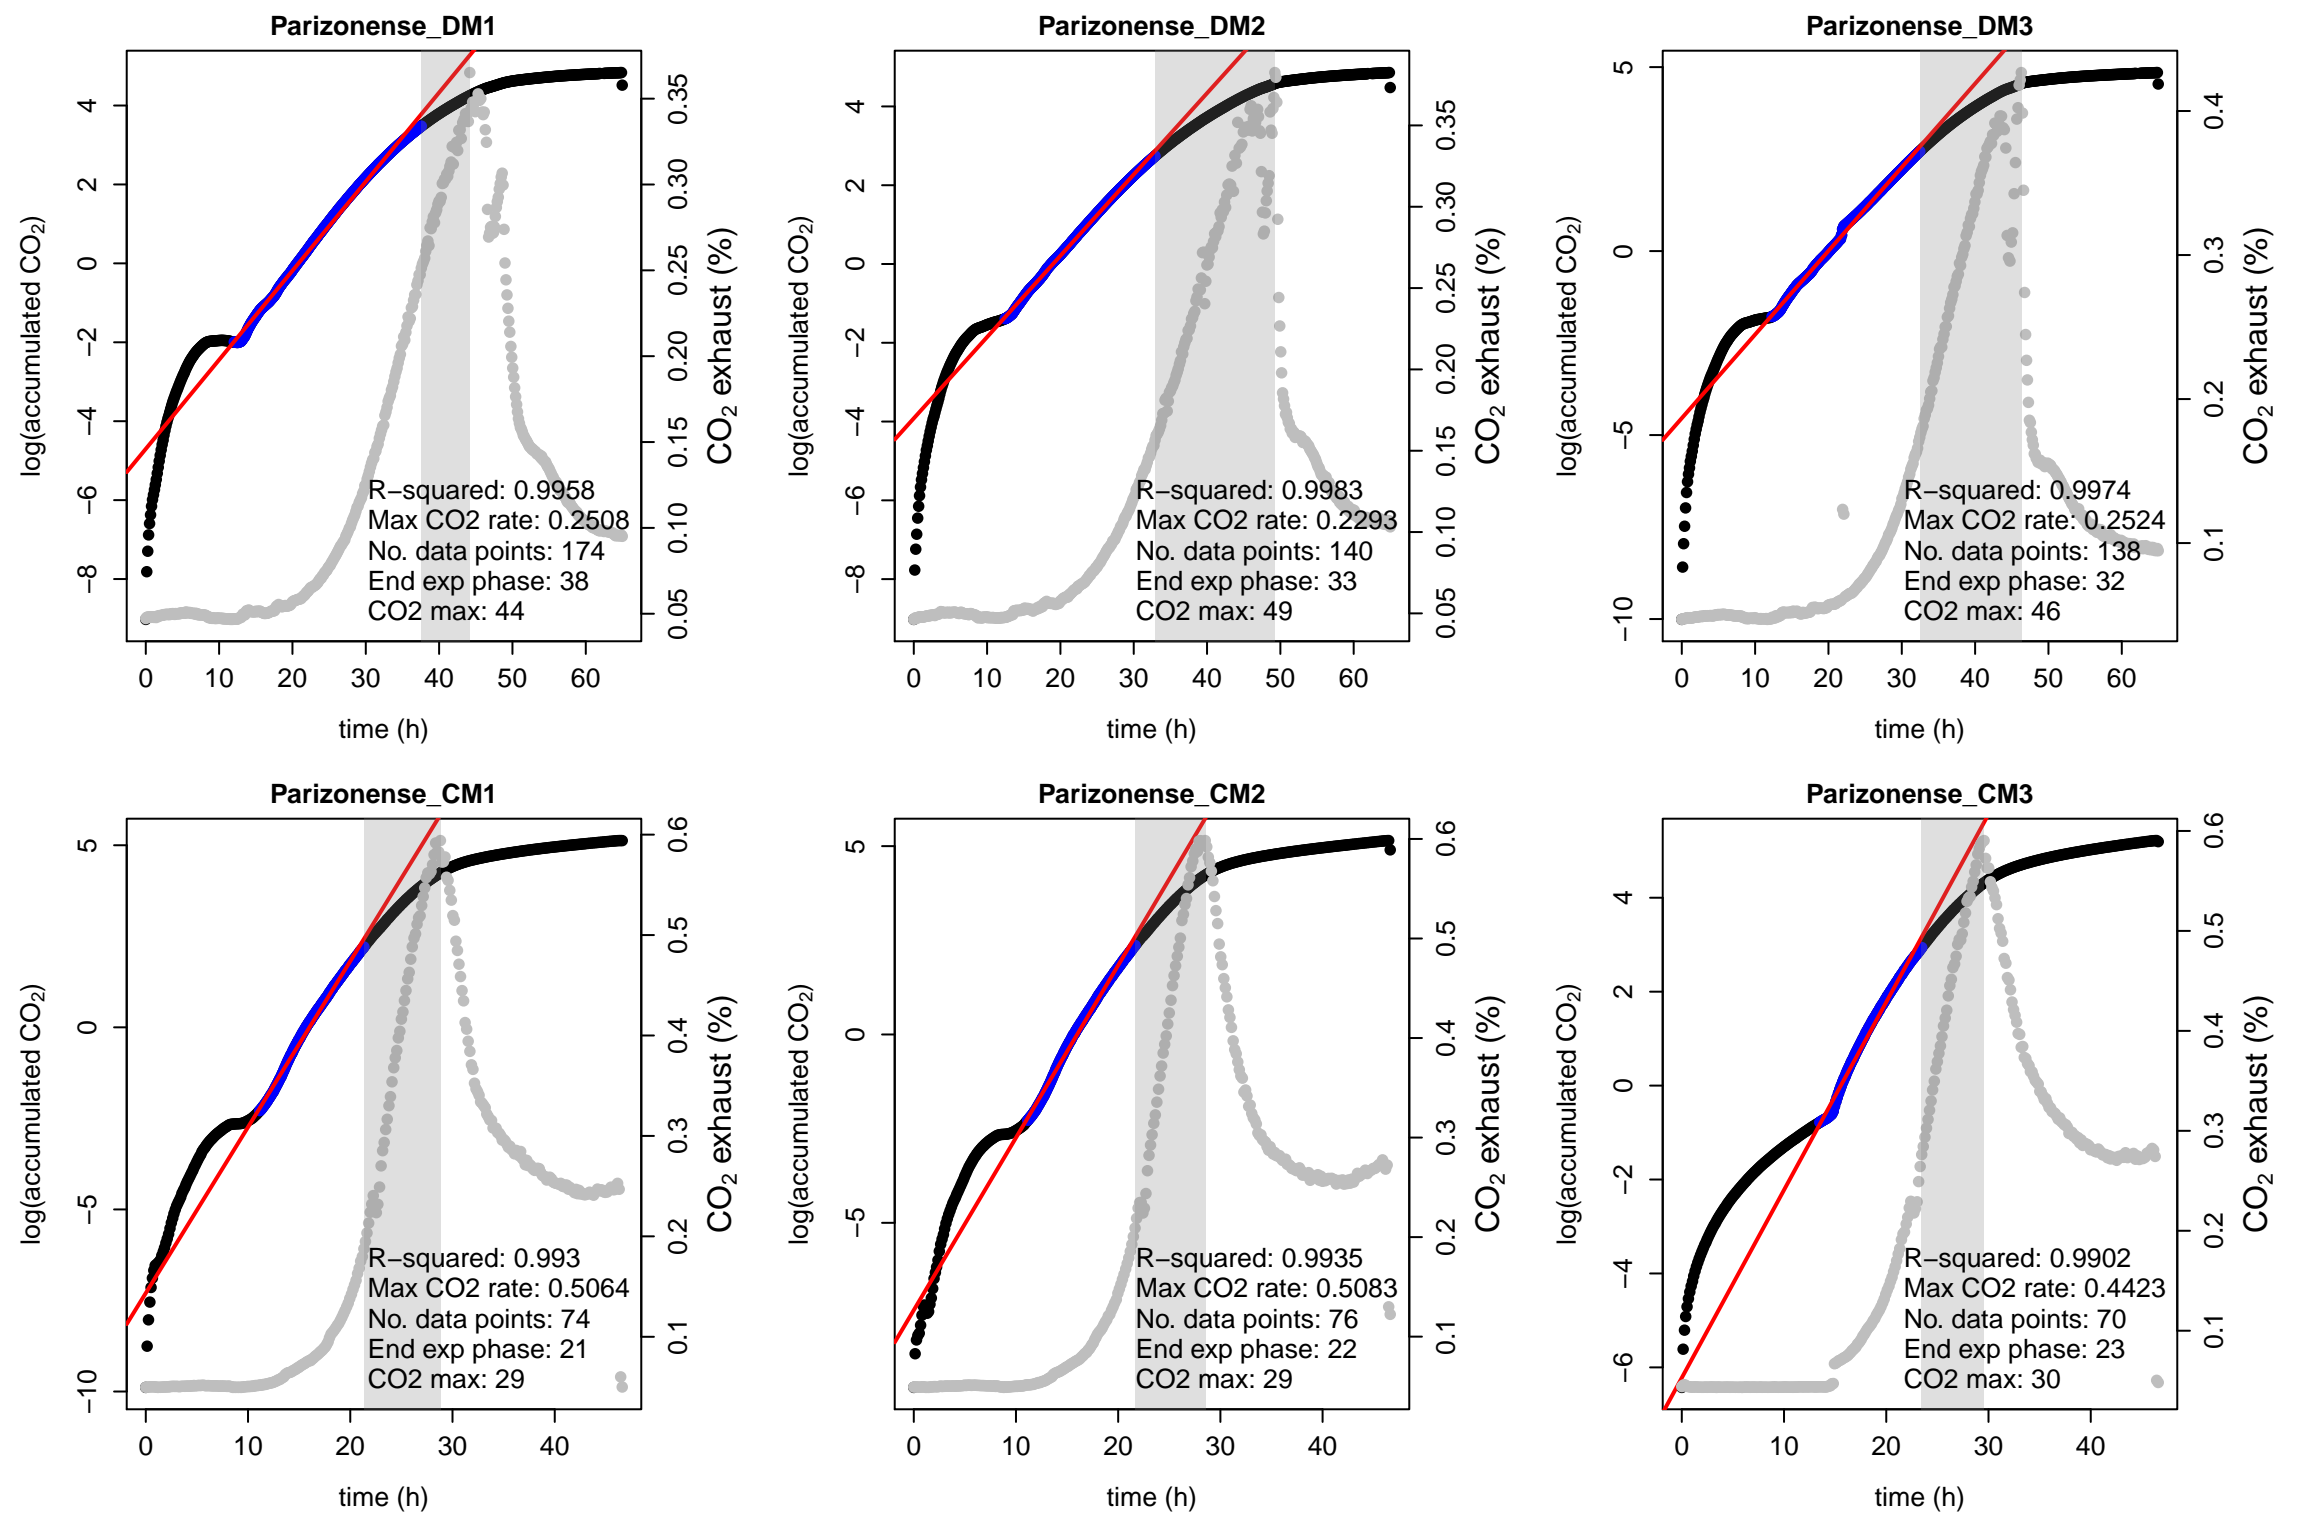

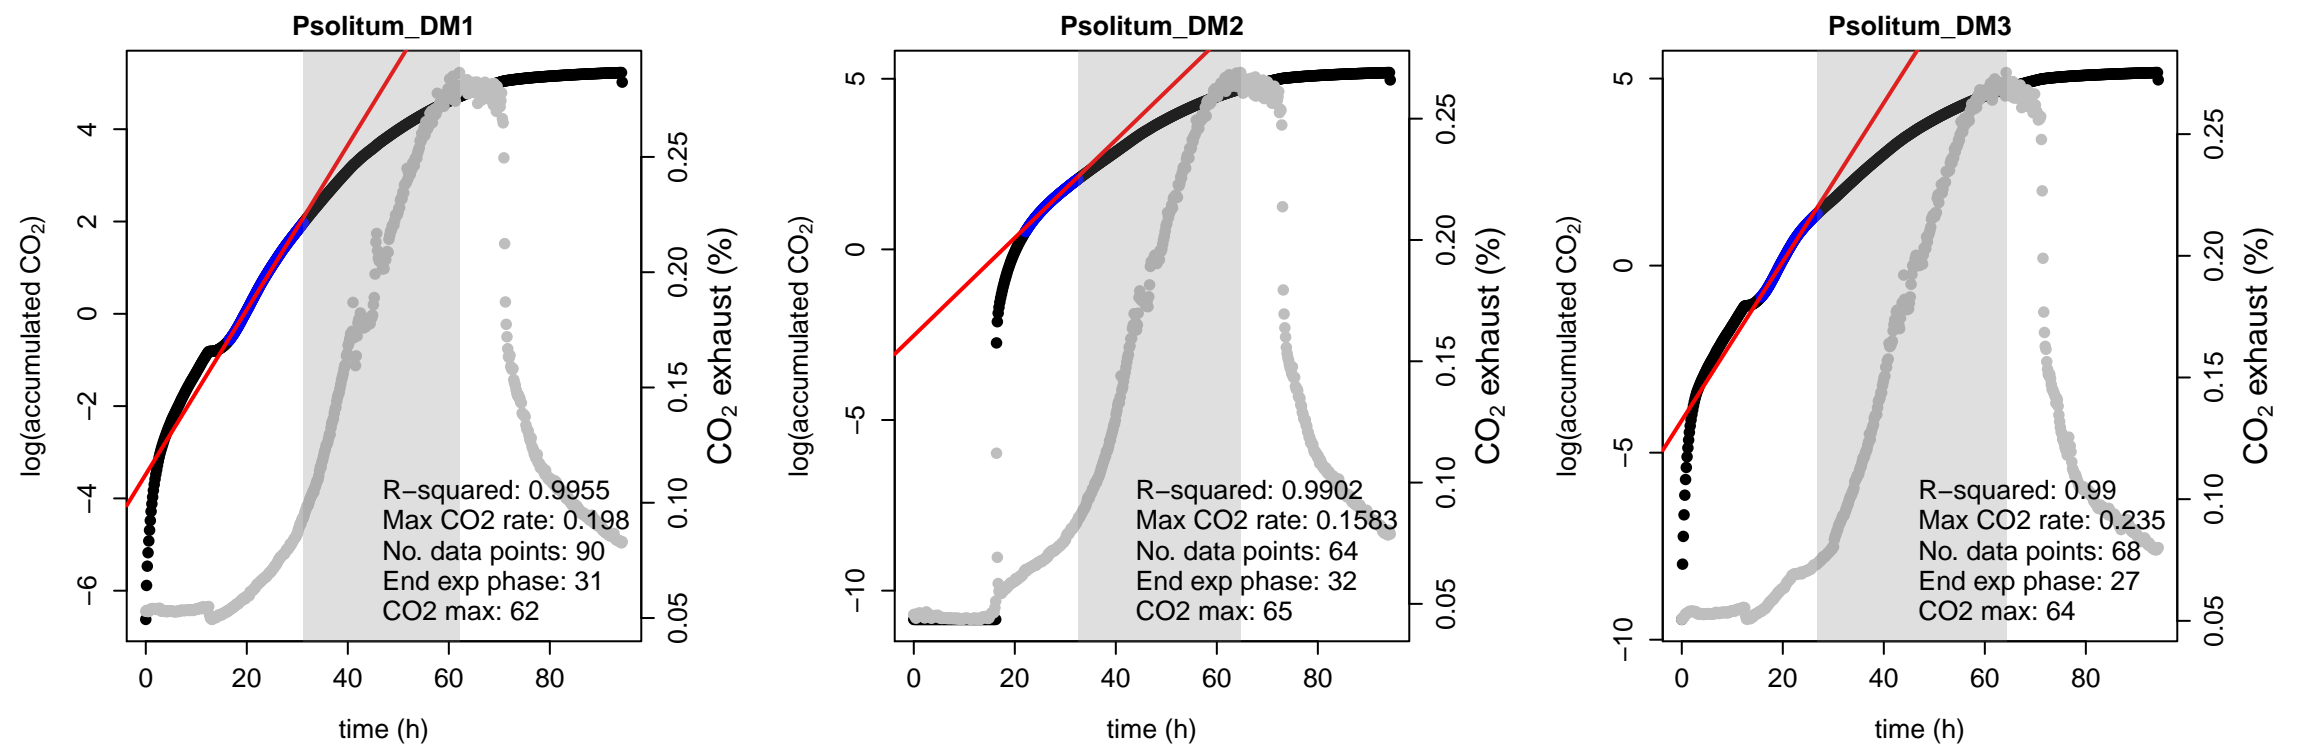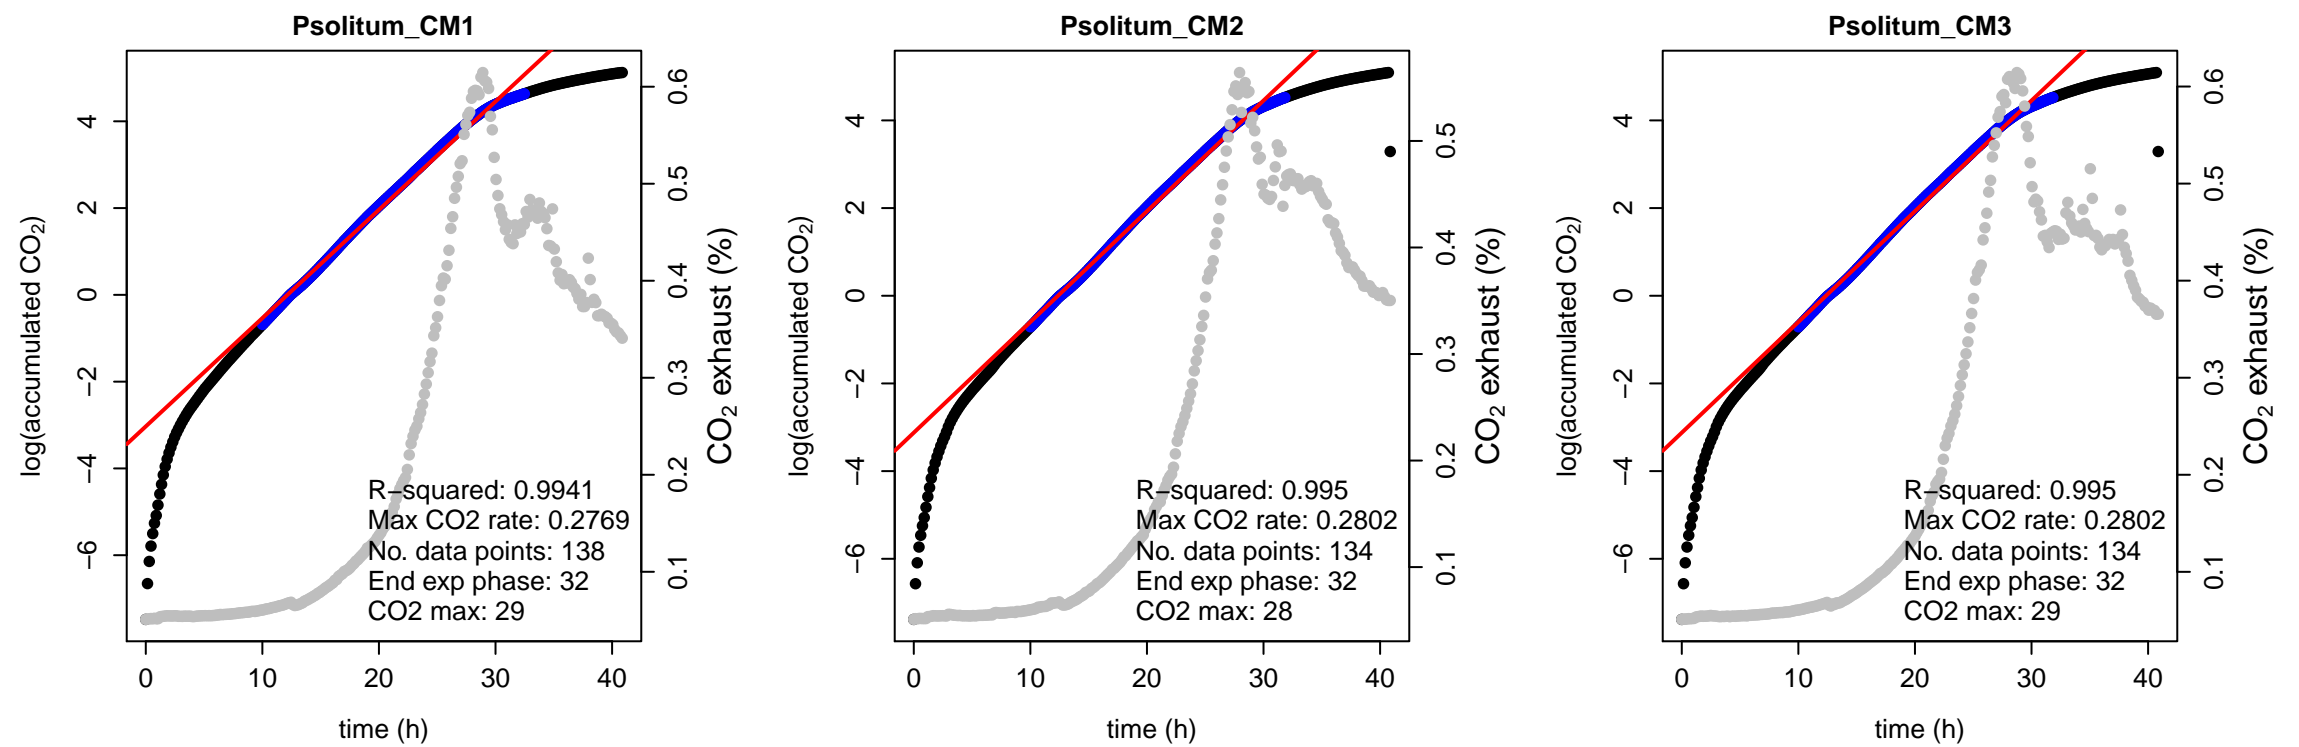

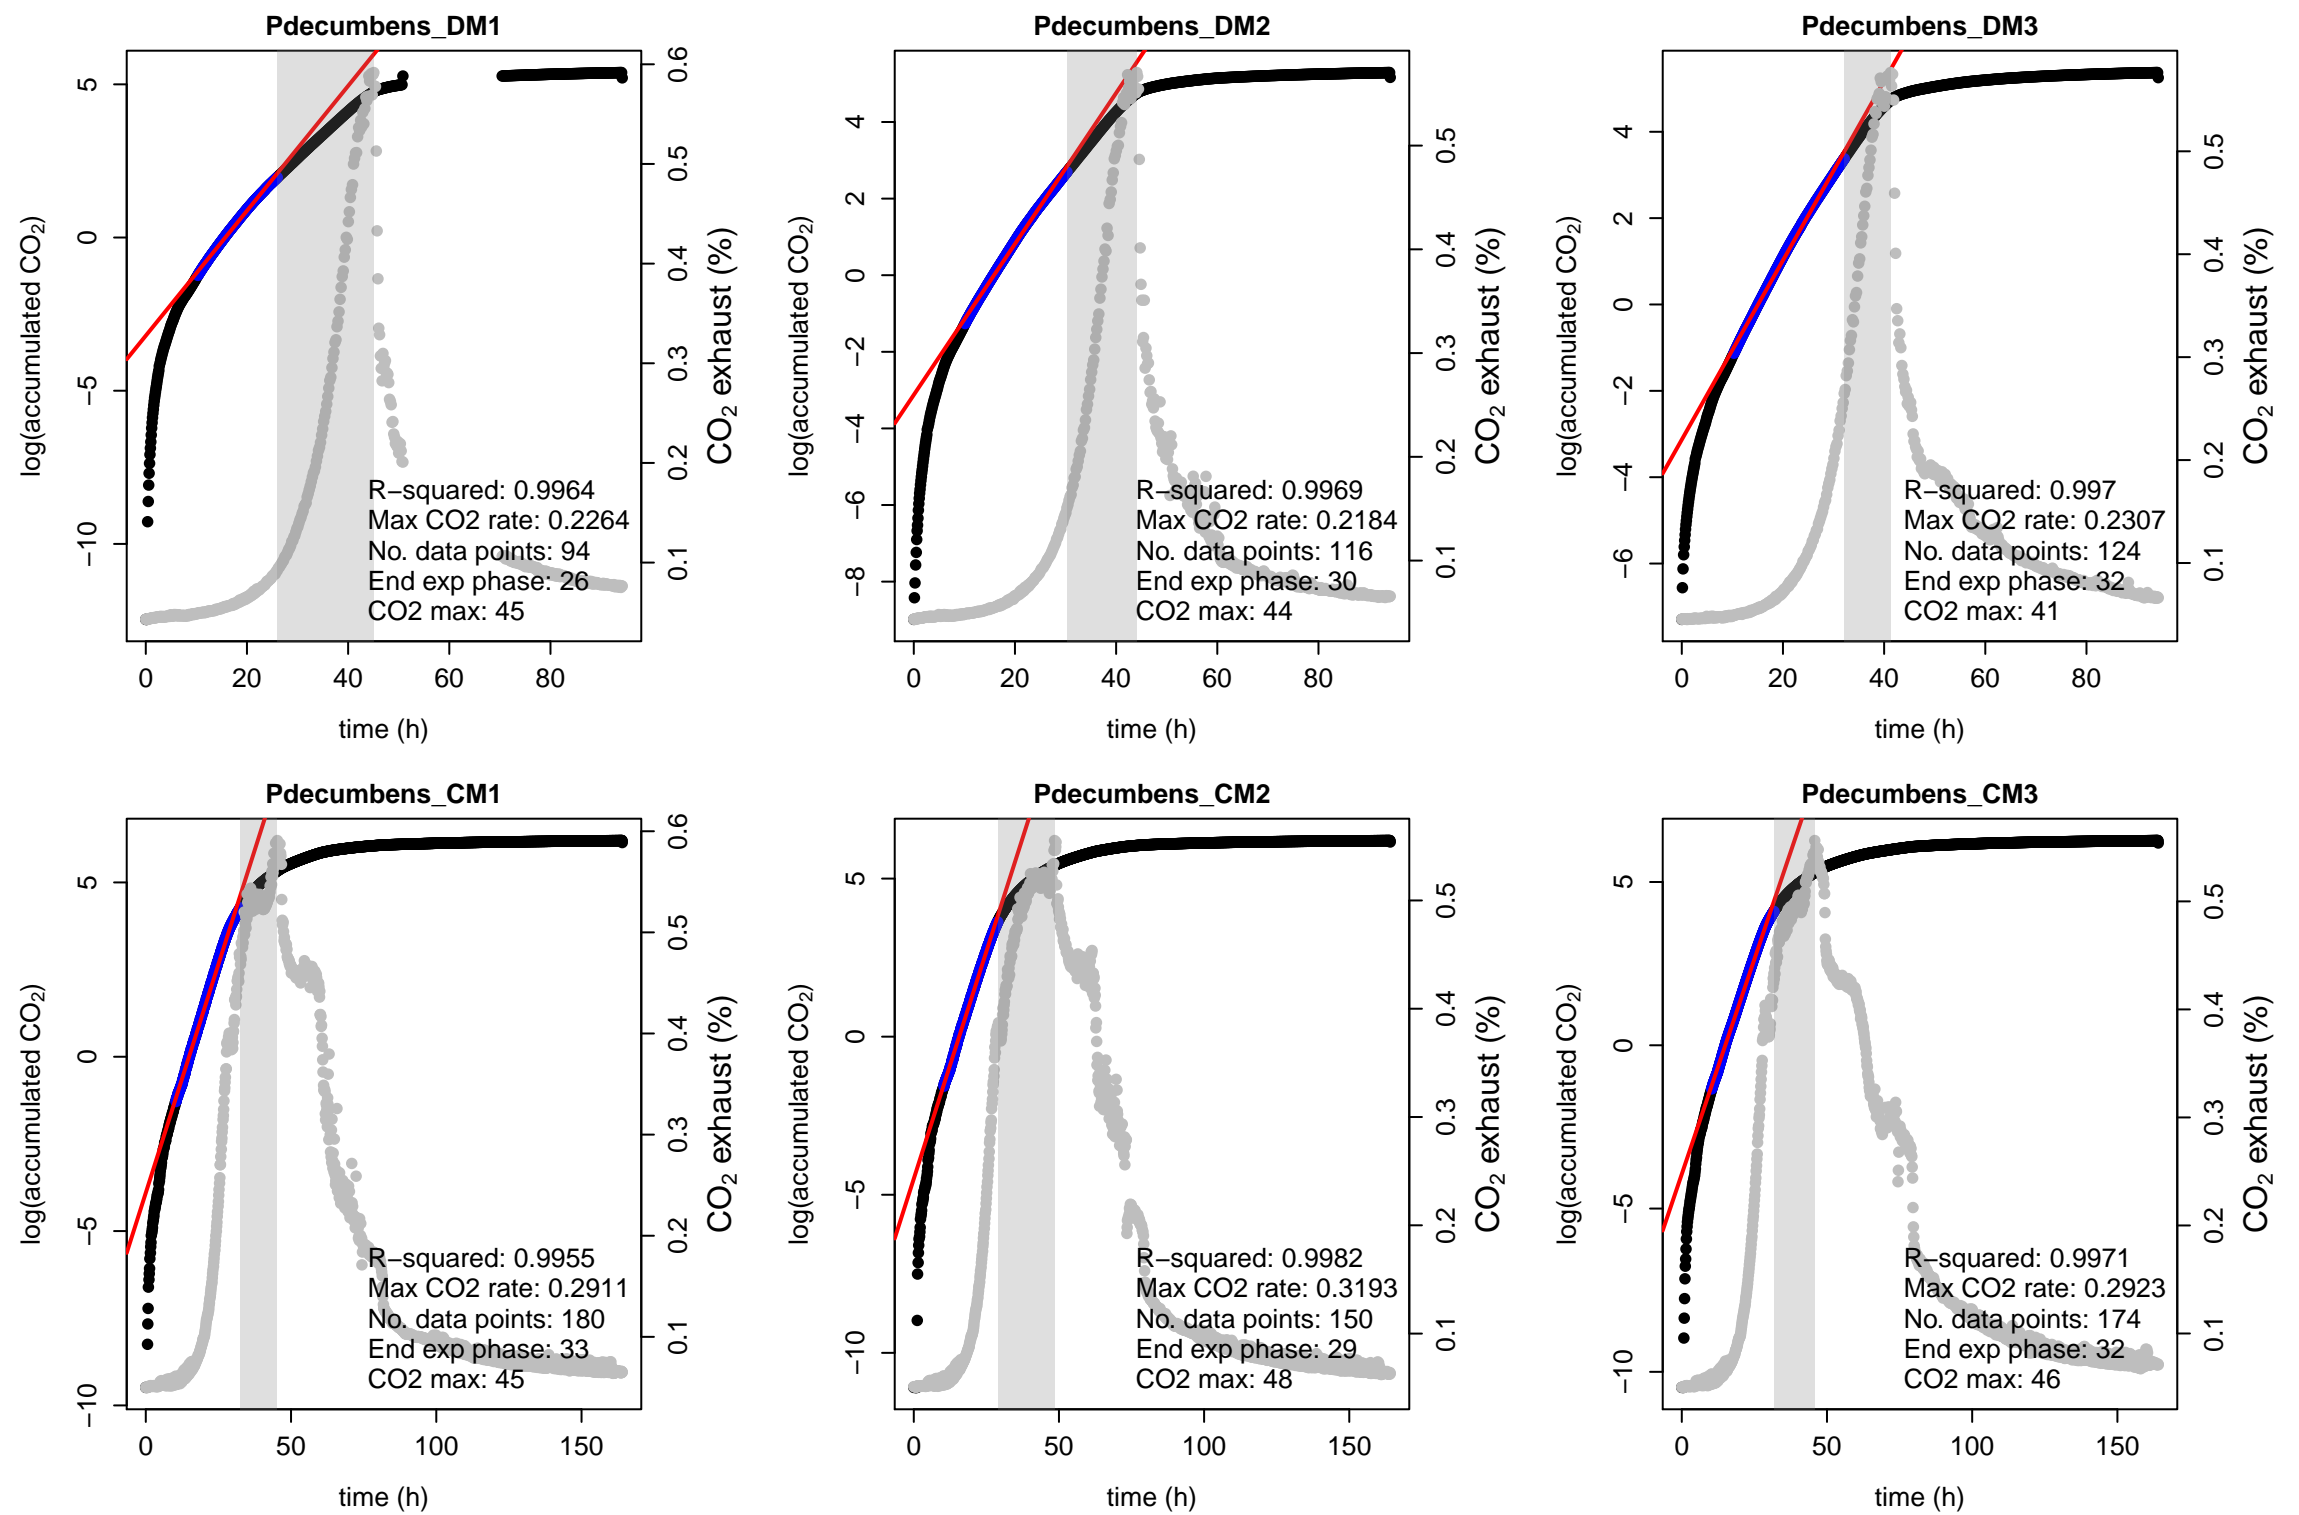



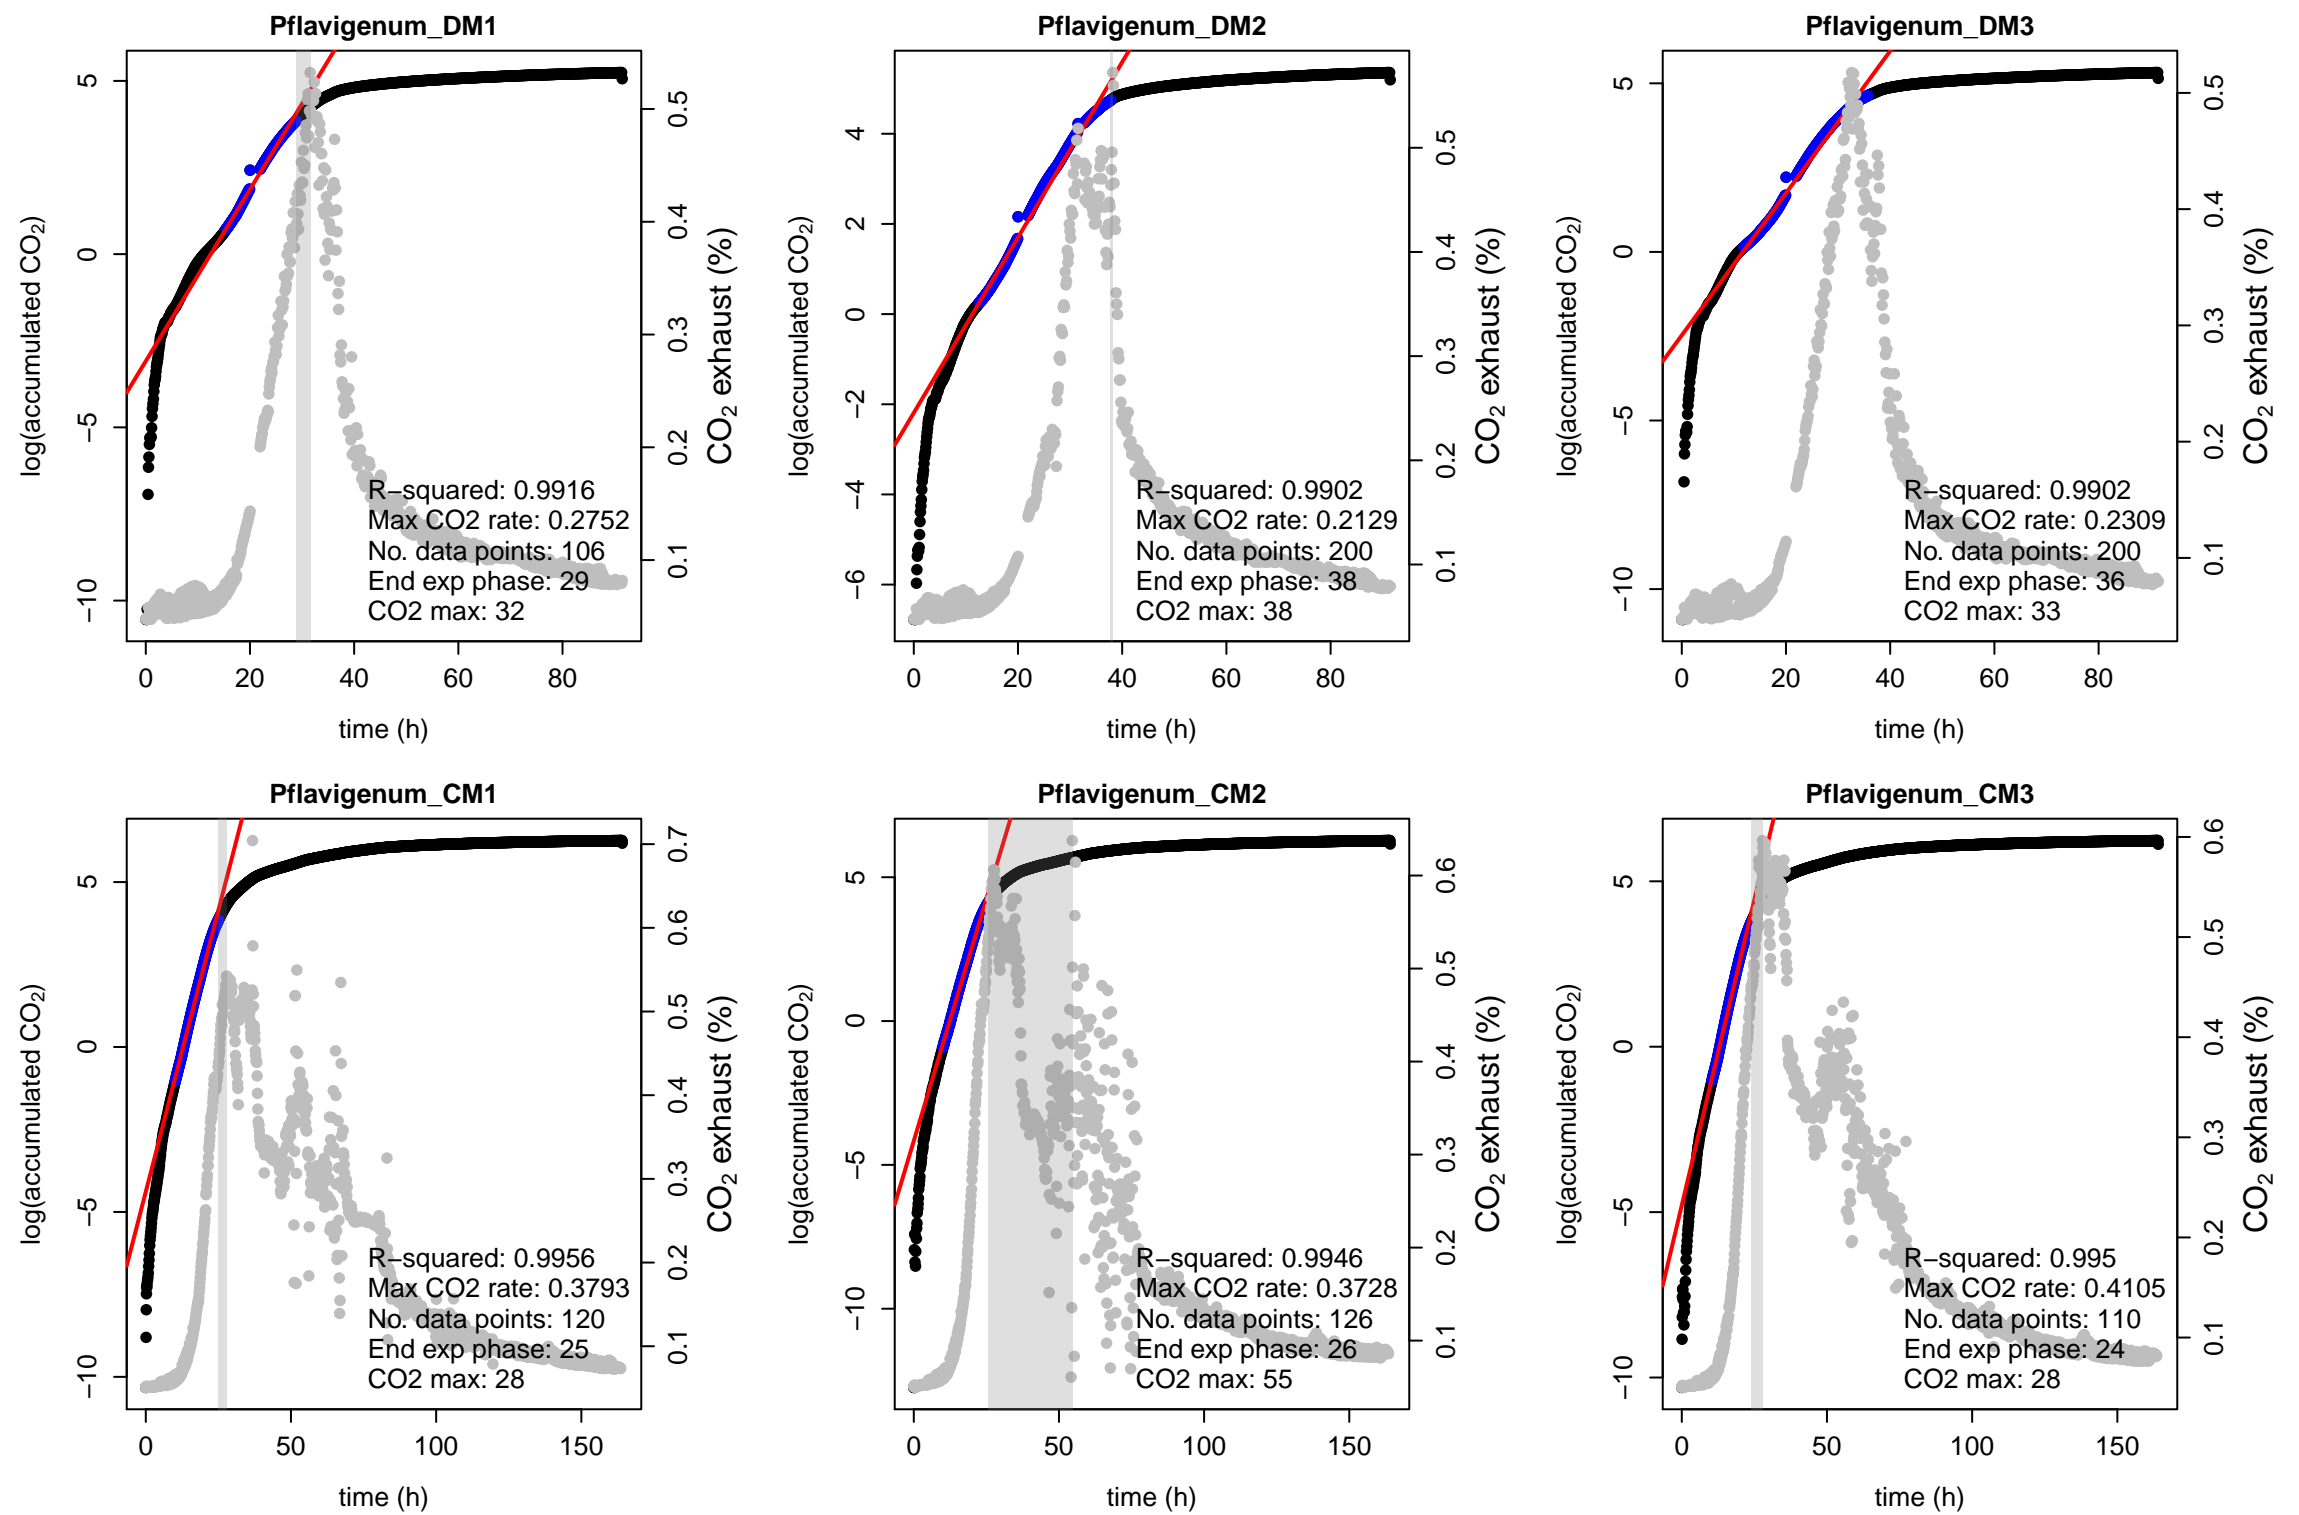

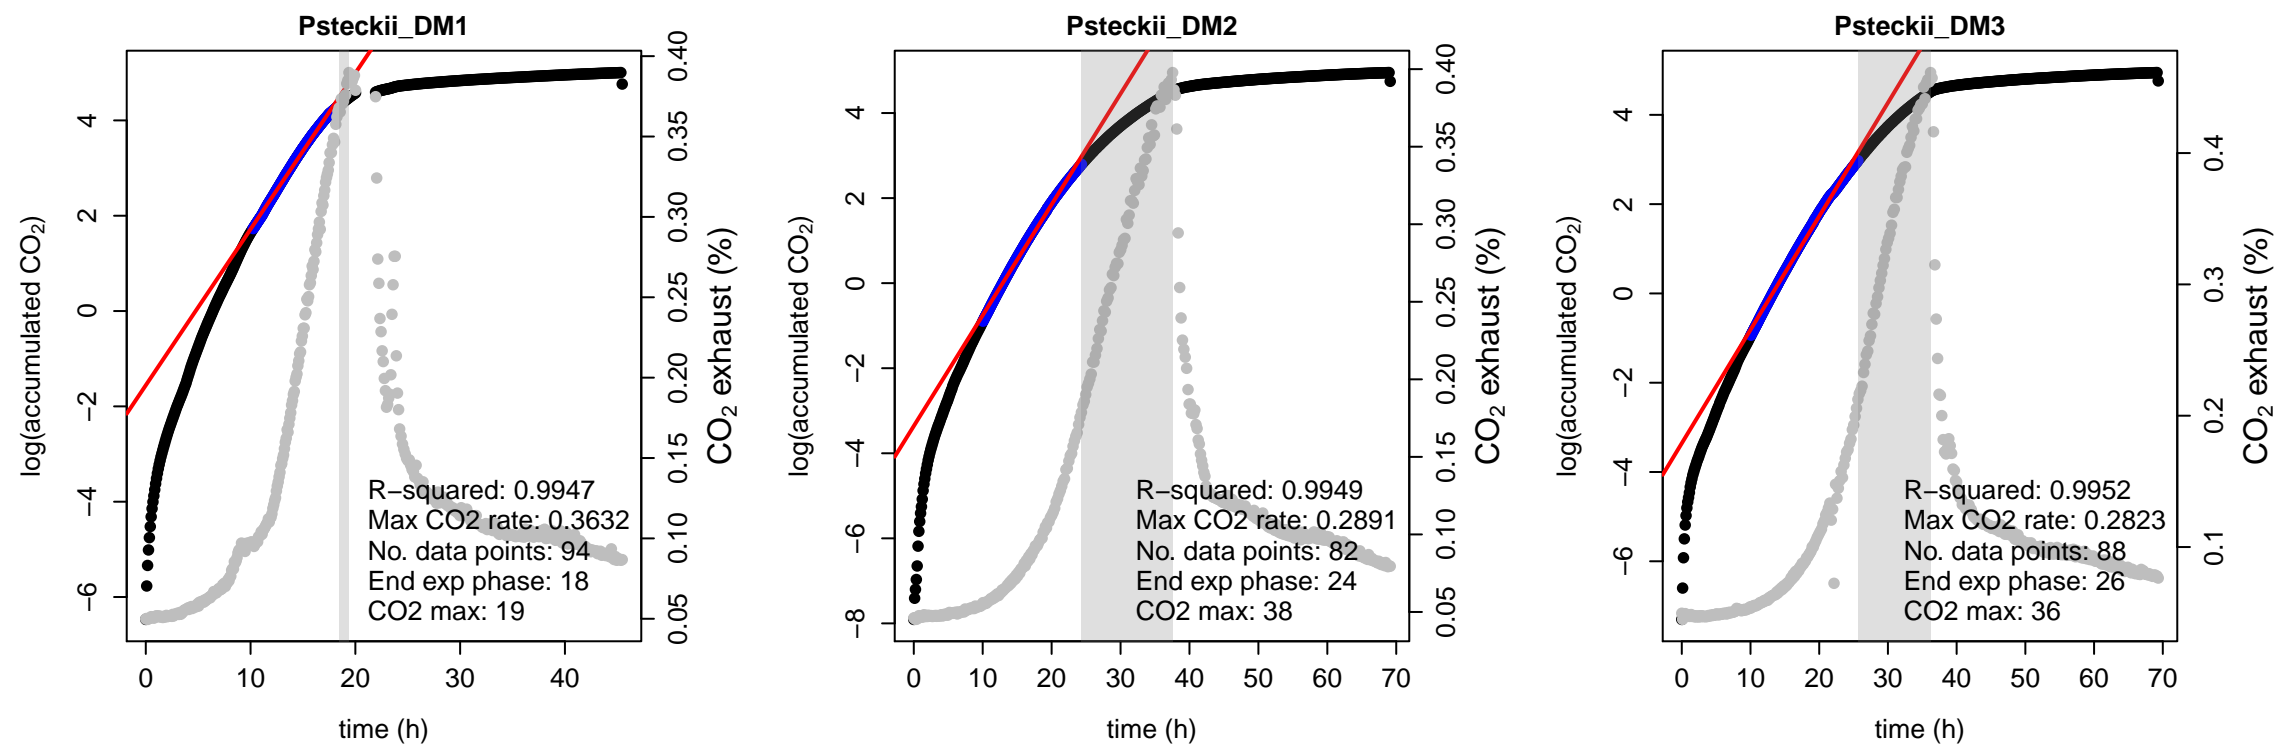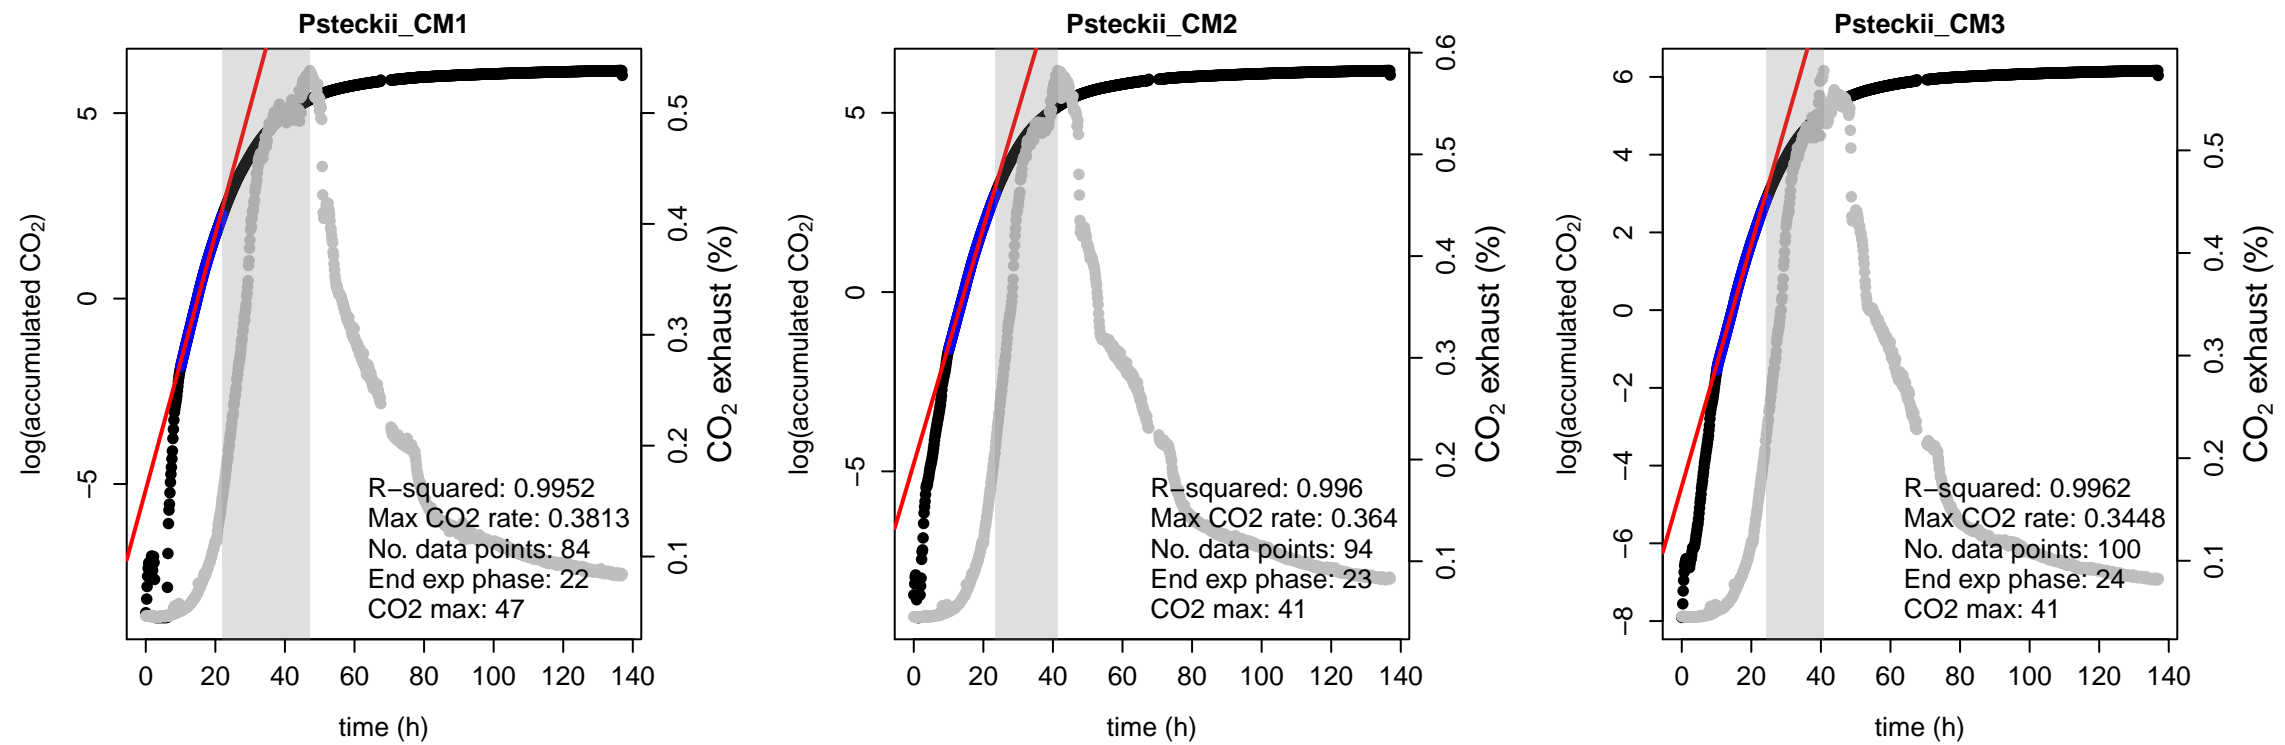

Supplement: 40694_2017_36_MOESM1_ESM.pdf [file 40694_2017_36_MOESM1_ESM.pdf]
